# Supplementary material for: One-pot synthesis of N,S-doped pearl chain tube-loaded Ni3S2 composite materials for high-performance lithium–air batteries
Source: Royal Society of Chemistry journal article supplement (doi:10.1039/d0nr06344d), 2020-01-01
Supplement: d0nr06344d1.pdf [file d0nr06344d1.pdf]

## Supporting Information

# One-pot synthesis of N,S-doped pearl chain tube-loaded Ni<sub>3</sub>S<sub>2</sub> composite materials for high-performance lithium-air batteries

Bohan An,<sup>a</sup> Jiacheng Li,<sup>a</sup> Xiaochao Wu,<sup>a</sup> Wanqing Li,<sup>a,b,\*</sup> Yongliang Li,<sup>a</sup> Lingna Sun,<sup>a</sup> Hongwei Mi,<sup>a</sup> Qianling Zhang,<sup>a</sup> Chuanxin He,<sup>a</sup> Xiangzhong Ren<sup>a,\*</sup>

<sup>a</sup> College of Chemistry and Environmental Engineering, Shenzhen University,  
Guangdong 518060, PR China

<sup>b</sup> Key Laboratory of Optoelectronic Devices and Systems of Ministry of Education  
and Guangdong Province, College of Physics and Optoelectronic Engineering,  
Shenzhen University, Shenzhen 518060, China

\*Corresponding author.

E-mail address: renxz@szu.edu.cn, , liwanqing136@foxmail.com

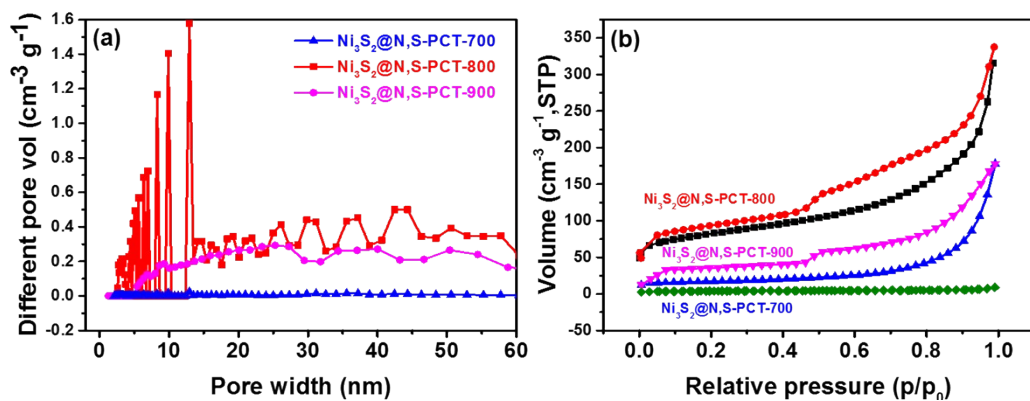

**Figure S1** Under different temperature gradients (a)  $\text{Ni}_3\text{S}_2@\text{N,S-PCT}$  of pore size distribution; (b)  $\text{Ni}_3\text{S}_2@\text{N,S-PCT}$  of adsorption isotherm

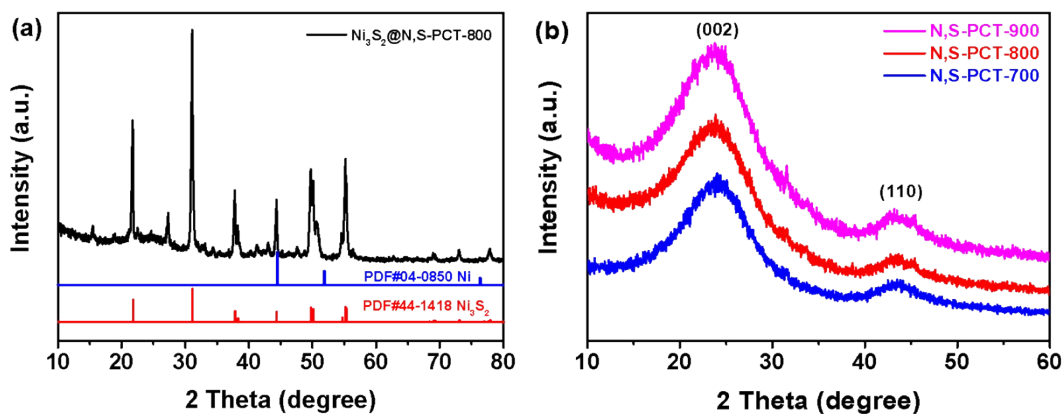

**Figure S2** (a) XRD of material sample coated on carbon paper; (b) XRD of N,S-PCT at different temperatures

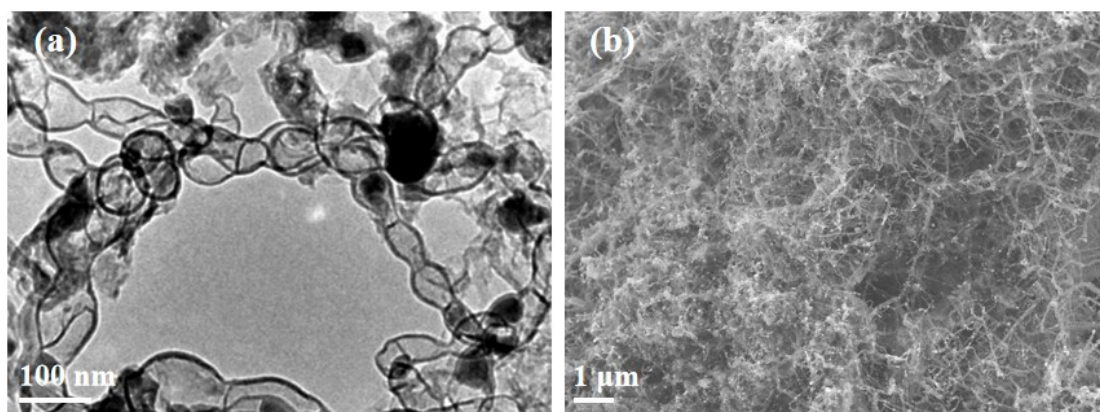

**Figure S3** (a) Mapping the diameter of the carbon layer of N,S-PCTs; (b) the whole frame of  $\text{Ni}_3\text{S}_2@\text{N,S-PCT-800}$

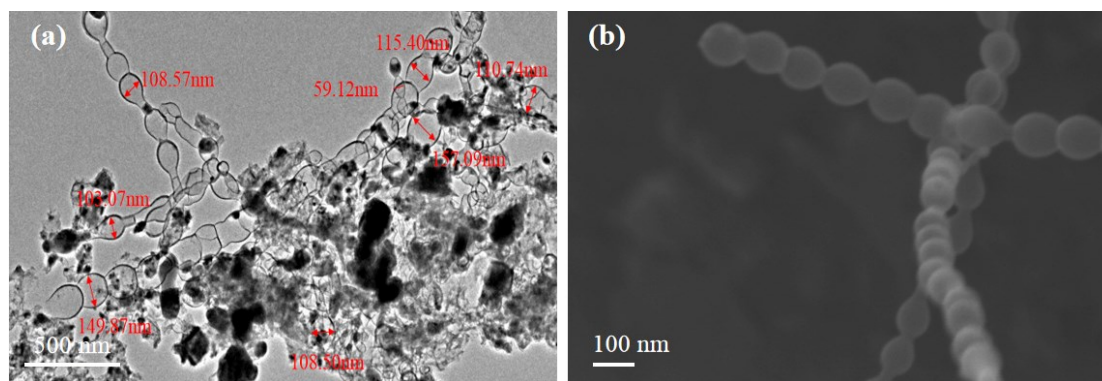

**Figure S4** (a) Mapping the diameter of  $\text{Ni}_3\text{S}_2@\text{N,S-PCT-800}$ ; (b) SEM images of  $\text{N,S-PCT-800}$ . The  $\text{N,S-PCT-800}$  obtained, the morphology of the carbon tube presents a pearl chain shape.

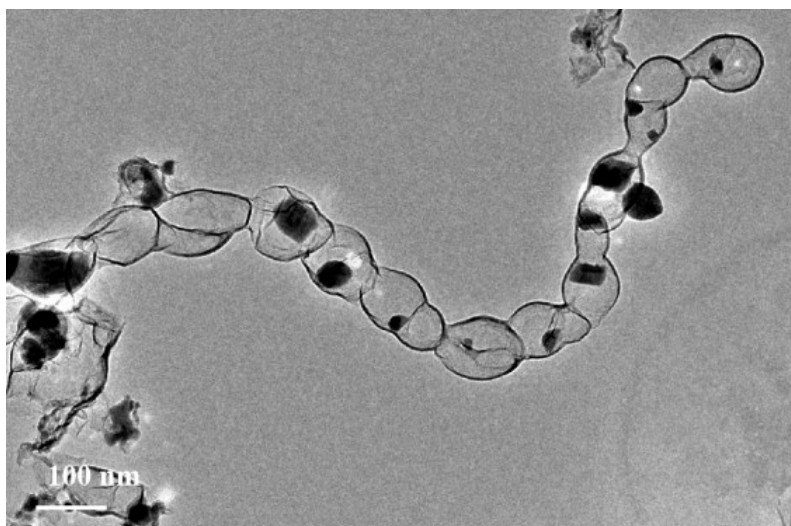

**Figure S5.** HRTEM images of  $\text{Ni}_3\text{S}_2@\text{N,S-PCT-800}$

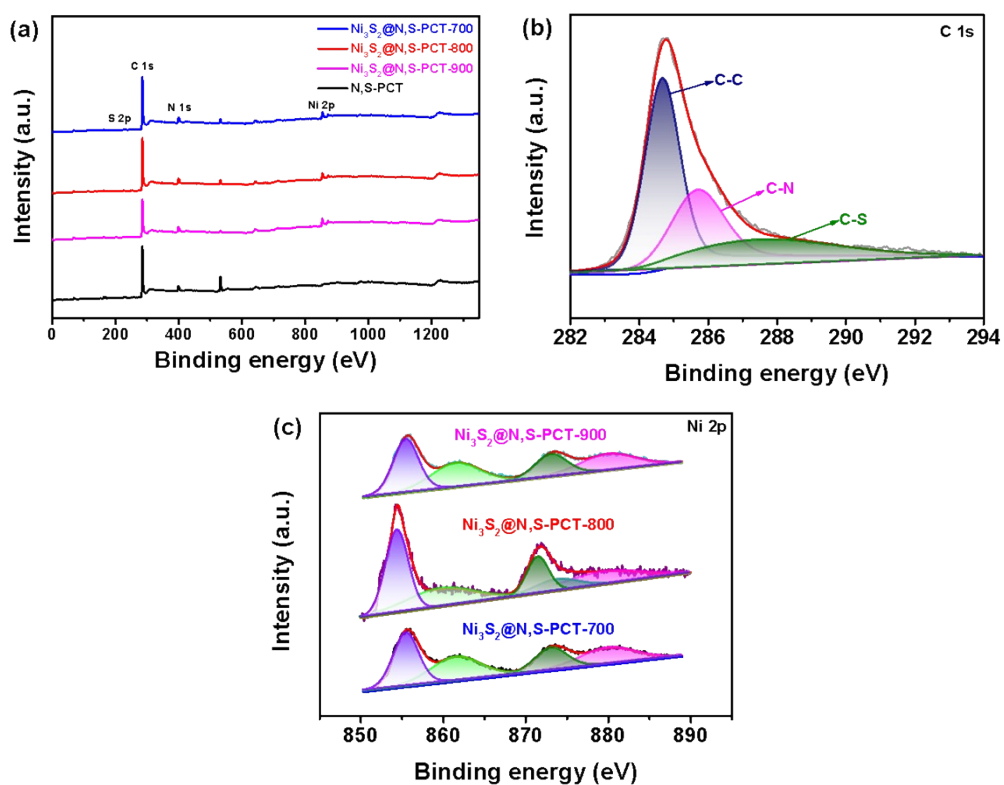

**Figure S6** (a) XPS analysis of the samples in different temperatures; (b) XPS pattern of C 1s; (c) XPS pattern of Ni 2p from 700°C to 900°C

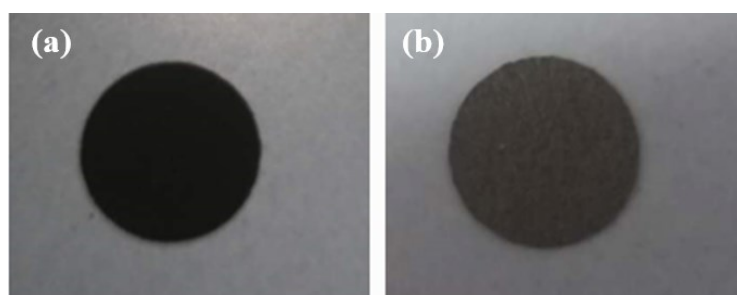

**Figure S7.** (a) loaded carbon paper (b) Original carbon paper

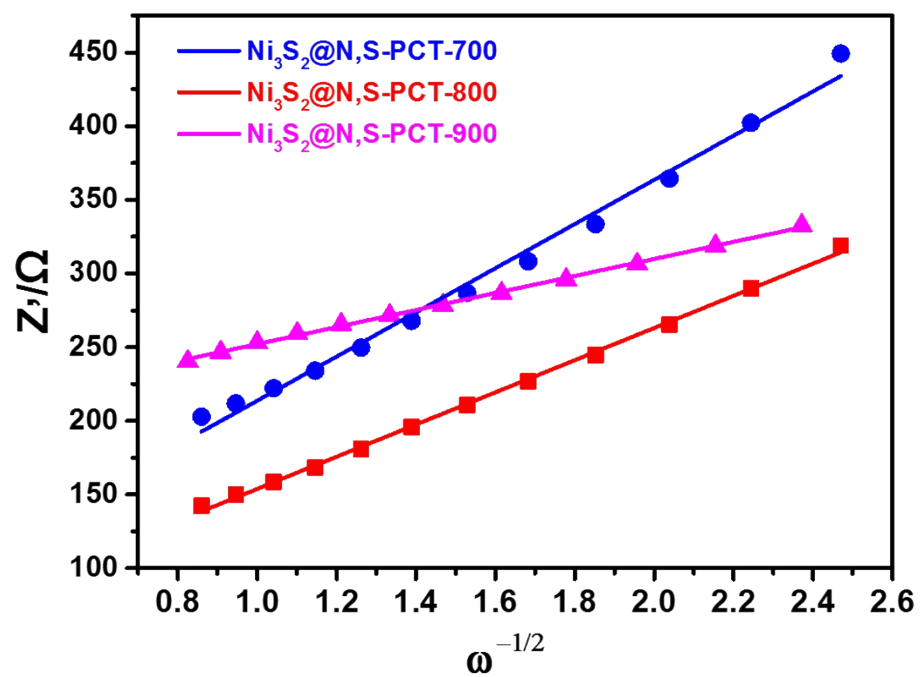

Figure S8. The relationship between  $Z'$  and  $\omega^{-1/2}$  of  $O_2$  electrode

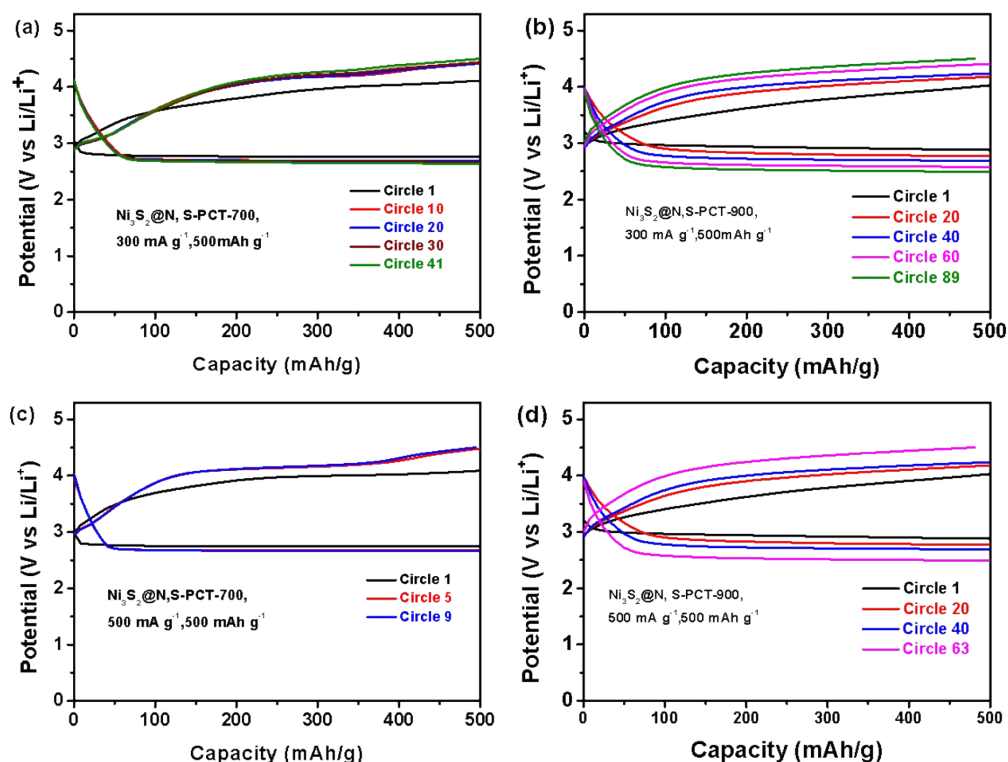

**Figure S9.** The discharge/charge profiles of (a) Ni<sub>3</sub>S<sub>2</sub>@N,S-PCT-700 and (b) Ni<sub>3</sub>S<sub>2</sub>@N,S-PCT-900, at a current density of 300 mA g<sup>-1</sup> with a limited capacity of 500 mAh g<sup>-1</sup>. The discharge/charge profiles of (c) Ni<sub>3</sub>S<sub>2</sub>@N,S-PCT-700 and (d) Ni<sub>3</sub>S<sub>2</sub>@N,S-PCT-900, at a current density of 500 mA g<sup>-1</sup> with a limited capacity of 500 mAh g<sup>-1</sup>

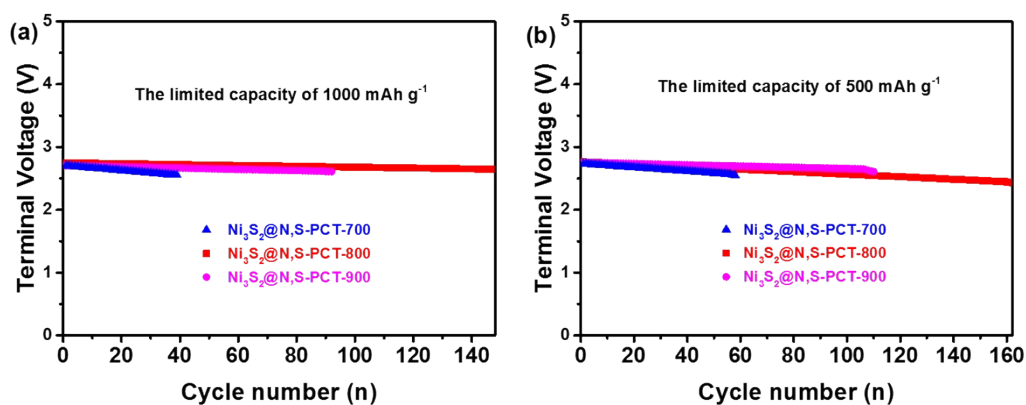

**Figure S10.** Cycle performance of the Ni<sub>3</sub>S<sub>2</sub>@N,S-PCT-900, Ni<sub>3</sub>S<sub>2</sub>@N,S-PCT-800 and Ni<sub>3</sub>S<sub>2</sub>@N,S-PCT-700 electrodes (a) at current density of 450 mA g<sup>-1</sup> with limited capacity of 1000 mAh g<sup>-1</sup> (b) at current density of 500 mA g<sup>-1</sup> with limited capacity of 500 mAh g<sup>-1</sup>

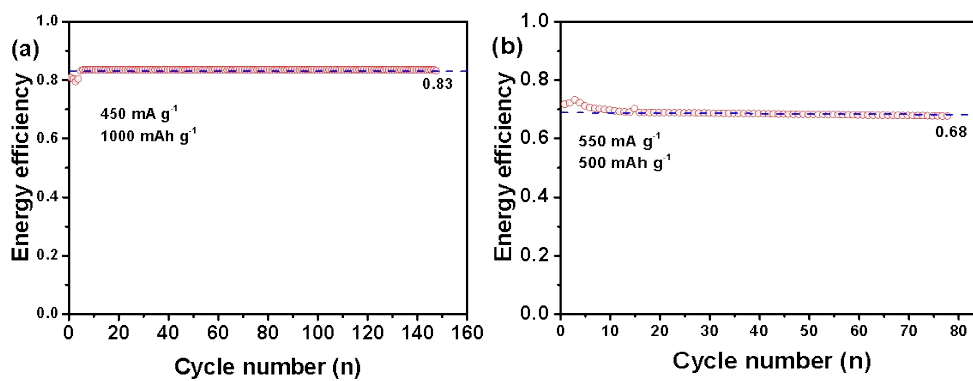

**Figure S11.** The cycle efficiency of Ni<sub>3</sub>S<sub>2</sub>@N,S-PCT-800 (a) the current density is 450 mA g<sup>-1</sup> and the limited capacity is 1000 mA g<sup>-1</sup> (b) the current density is 550 mA g<sup>-1</sup> and the limited capacity is 500 mA g<sup>-1</sup>

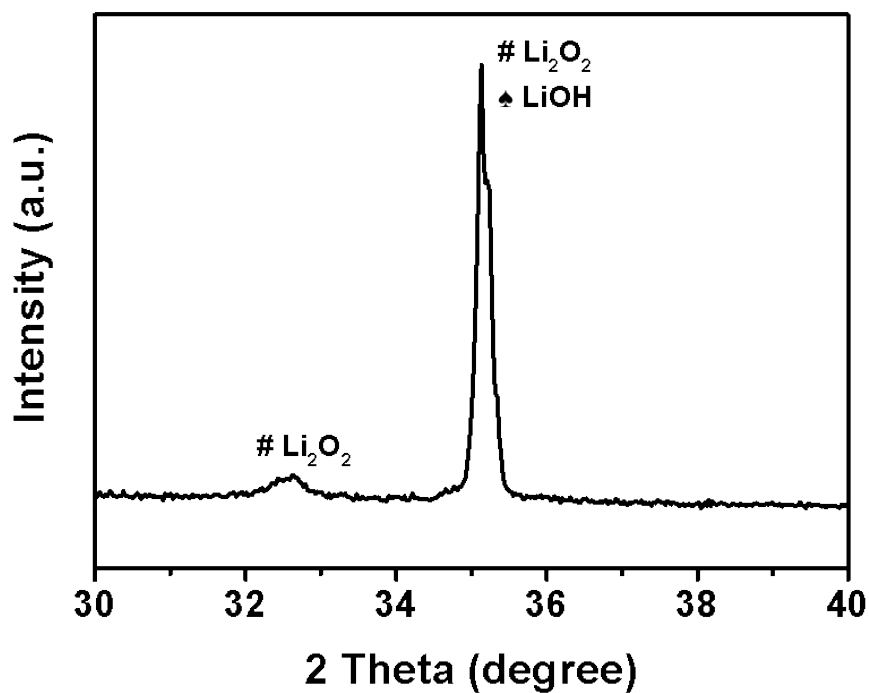

**Figure S12.** XRD analysis chart of discharge products in a certain range.

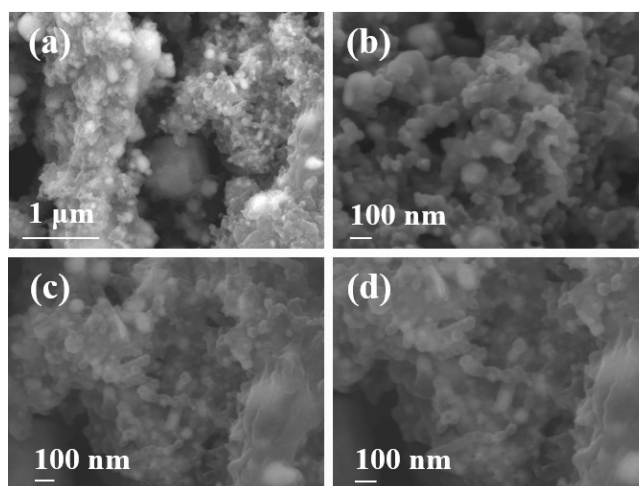

**Figure S13.** SEM image of materials after circulation in different positions (a) Magnification is 20,000; (b) Magnification is 50,000; (c) Magnification is 40,000; (d) Magnification is 50,000

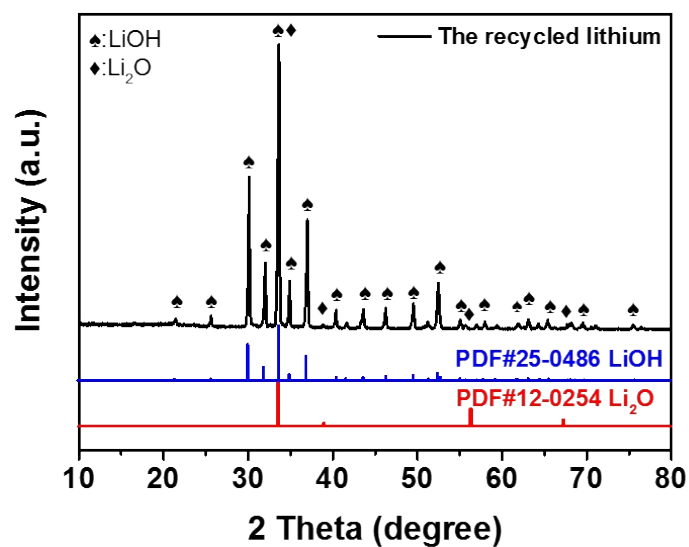

**Figure S14.** XRD patterns of the recycled lithium



**Table S1.** Elemental content percentage measured by XPS

| Sample name                                 | Ni<br>(at. %) | O<br>(at. %) | C<br>(at. %) | N<br>(at. %) | S<br>(at. %) |
|---------------------------------------------|---------------|--------------|--------------|--------------|--------------|
| Ni <sub>3</sub> S <sub>2</sub> @N,S-PCT-900 | 1.8           | 11.06        | 76.51        | 7.73         | 2.91         |
| Ni <sub>3</sub> S <sub>2</sub> @N,S-PCT-800 | 3.24          | 2.98         | 81.95        | 10.63        | 1.34         |
| Ni <sub>3</sub> S <sub>2</sub> @N,S-PCT-700 | 1.88          | 4            | 83.96        | 9.13         | 1.03         |
| N,S-PCT                                     | 0.53          | 2.7          | 85.67        | 10.07        | 1.17         |

**Table S2.** Comparison of Li-O<sub>2</sub> battery properties of Ni<sub>3</sub>S<sub>2</sub>@N,S-PCT-800 cathode with those of representative state-of-the-art cathodes reported in literature.

| Catalysts                                      | Current Density (mA g <sup>-1</sup> ) | Overpotention (V) | Cycling Performance (Cycles/Limited Capacity) | First Discharge Capacity (mAh g <sup>-1</sup> ) | Ref.             |
|------------------------------------------------|---------------------------------------|-------------------|-----------------------------------------------|-------------------------------------------------|------------------|
| 2D Co <sub>3</sub> S <sub>4</sub> nanosheets   | 100                                   | 0.92              | 25/500                                        | 5917                                            | 1                |
| Ni <sub>3</sub> S <sub>2</sub>                 | 200                                   | 1.29              | 50/500                                        | 7478                                            | 2                |
| MoS <sub>2</sub> nanoflakes                    | 100                                   | ≥1.0              | 50/500                                        | 1250                                            | 3                |
| Ni <sub>3</sub> S <sub>2</sub> /PBSC NFs       | 100                                   | 0.68              | 120/500                                       | 12874                                           | 4                |
| Co <sub>9</sub> S <sub>8</sub>                 | 100                                   | 1.37              | 100/500                                       | 3500                                            | 5                |
| MoS <sub>x</sub> /HRG                          | 0.05                                  | 1.5               | 30/500                                        | 6678                                            | 6                |
| TiC/MWNTs-Ru                                   | 250                                   | 0.49              | 90/1000                                       | 3841                                            | 7                |
| GDP-Mo <sub>2</sub> C@NCF                      | 100                                   | 1.2               | 100/1000                                      | 7437                                            | 8                |
| NCS/S-3DPG                                     | 150                                   | 1.38              | 102/1000                                      | 14,173                                          | 9                |
| Co <sub>2</sub> P/Ru/CNT                       | 100                                   | 1.22              | 120/1000                                      | 12 800                                          | 10               |
| <b>Ni<sub>3</sub>S<sub>2</sub>@N,S-PCT-800</b> | <b>450</b>                            | <b>1.45</b>       | <b>148/1000</b>                               | <b>16733.7</b>                                  | <b>This work</b> |

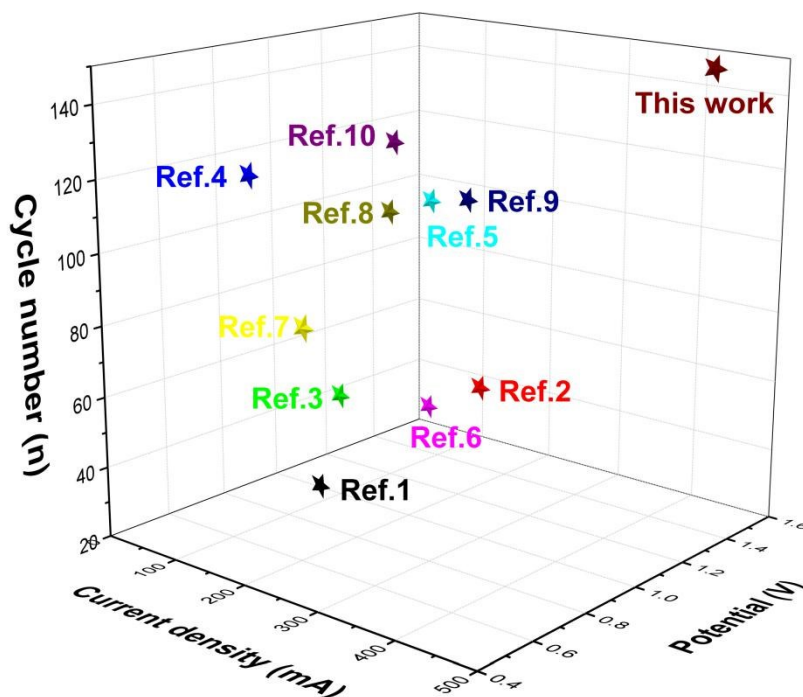

**Figure S12** Lithium-air battery performance of different types of cathode materials

## REFERENCE

1. P. Sennu, M. Christy, V. Aravindan, Y.-G. Lee, K. S. Nahm and Y.-S. Lee, *Chem. Mater.*, 2015, **27**, 5726-5735.
2. Q. Wang, X. Wang and H. He, *J. Power Sources*, 2020, **448**, 227397.
3. M. Asadi, B. Kumar, C. Liu, P. Phillips, P. Yasaei, A. Behranginia, P. Zapol, R. F. Klie, L. A. Curtiss and A. Salehi-Khojin, *ACS Nano*, 2016, **10**, 2167-2175.
4. Z. Zhang, K. Tan, Y. Gong, H. Wang, R. Wang, L. Zhao and B. He, *J. Power Sources*, 2019, **437**, 226908.
5. G. Wang, Y. Li, L. Shi, R. Qian and Z. Wen, *Chem. Eng. J.*, 2020, **396**, 125228.
6. L. Li, C. Chen, J. Su, P. Kuang, C. Zhang, Y. Yao, T. Huang and A. Yu, *J. Mater. Chem. A*, 2016, **4**, 10986-10991.
7. C.-S. Yang, Z. Sun, Z. Cui, F.-L. Jianga, J.-W. Denga and T. Zhang, *Energy Storage Mater.*, 2020, **30**, 59-66.
8. Z. Sun, B. Li, C. Feng, X. Cao, X. Zheng, K. Zeng, C. Jin, X. Wu, D. Dai and R. Yang, *J. Mater. Chem. A*, 2020, **8**, 14815-14821.
9. S. Hyun, B. Son, H. Kim, J. Sanetuntikul and S. Shanmugam, *Appl. Catal. B*, 2020, **263**, 118283.
10. P. Wang, C. Li, S. Dong, X. Ge, P. Zhang, X. Miao, Z. Zhang, C. Wang and L. Yin, *Small*, 2019, **15**, 1900001.
